# Supplementary material
Source: ML conference proceedings conference paper supplement (https://proceedings.neurips.cc/paper_files/paper/2009/hash/7250eb93b3c18cc9daa29cf58af7a004-Abstract.html)
Supplement: Supplementary file [file 7250eb93b3c18cc9daa29cf58af7a004-Supplemental.zip]

---

## Appendix : Convex Relaxation of Mixture Regression with Efficient Algorithms

---

**Novi Quadrianto, Tibério S. Caetano, John Lim**  
NICTA - Australian National University  
Canberra, Australia  
{firstname.lastname}@nicta.com.au

**Dale Schuurmans**  
University of Alberta  
Edmonton, Canada  
dale@cs.ualberta.ca

### A Hopkins 155 Dataset

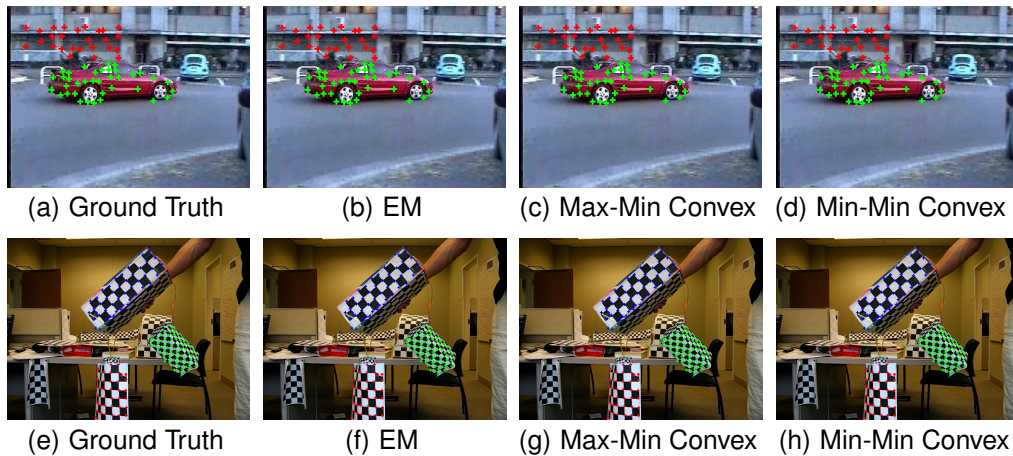

Figure 1: Resulting motion segmentations produced by the various techniques on the Hopkins 155 dataset. 1(a)-1(d): kanatani2 and 1(e)-1(h): articulated. All techniques give perfect segmentation in kanatani2 (first row) and articulated (second row).
